# Supplementary material for: Curdlan Prevents the Cognitive Deficits Induced by a High-Fat Diet in Mice via the Gut-Brain Axis
Source: PubMed Central journal article supplement (PMC7239995; doi:10.3389/fnins.2020.00384), 2020-05-14
Supplement: Data_Sheet_1.pdf [file Data_Sheet_1.pdf]

## Supplementary Material

### Supplementary Figures

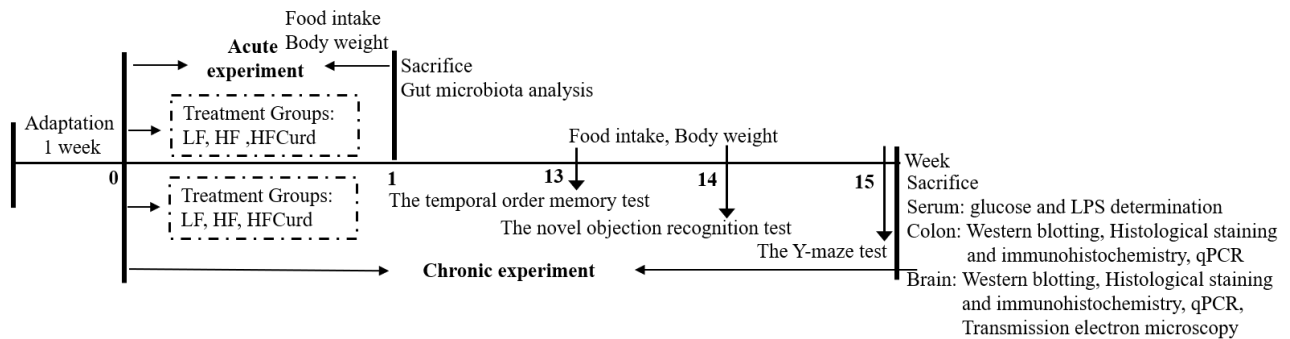

**Supplementary Figure 1.** Schematic figure of the experimental timeline.

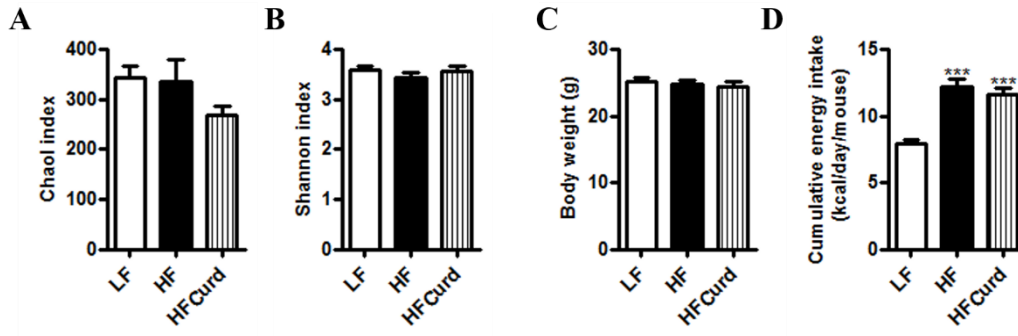

**Supplementary Figure 2.** Effect of curdlan on species richness and diversity, energy intake and body weight in mice fed a HF diet for seven days. (A) richness (Chao1 index) and (B) diversity (Shannon index) of gut microbial communities based on OUT, n=5; (C) body weight, (D) energy intake, n=10. Values are mean  $\pm$  standard error of means. \*\*\*p<0.001 vs. LF.

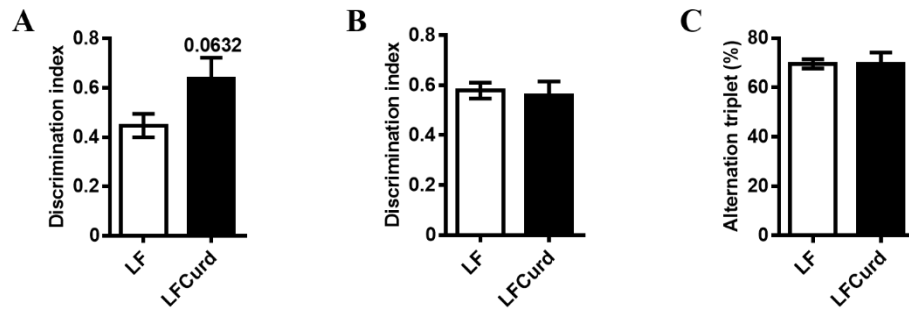

**Supplementary Figure 3.** Effects of chronic curdlan supplementation on cognitive function in mice fed a LF diet. (A) discrimination index in the temporal order memory test, (B) discrimination index in the novel object recognition test, (C) proportion of correct alternations in the Y-maze test. Alteration triplet %: was calculated as [number of successful alternations/(total number of arms entries-2) × 100]. n=10. Values are mean ± standard error of means.

## Supplementary Tables

Supplementary Table 1. Primers used for qPCR

| Mouse Gene     | Forward Primer (5'→3')       | Reverse Primer (5'→3')        |
|----------------|------------------------------|-------------------------------|
| TNF- $\alpha$  | CTTGTTGCCTCCTCTTTTGCTTA      | CTTTATTTCTCTCAATGACCCG<br>TAG |
| IL-1 $\beta$   | TGGGAAACAACAGTGGTCAGG        | CTGCTCATTACGAAAAGGGA          |
| IL-6           | TCACAGAAGGAGTGGCTAAGGA<br>CC | ACGCACTAGGTTTGCCGAGTA<br>GAT  |
| IL-10          | GGAAGACAATAACTGCACCCAC<br>T  | CAACCCAAGTAACCCTTAAAG<br>TCC  |
| $\beta$ -actin | TGAGAGGGAAATCGTGCGTGAC       | GCTCGTTGCCAATAGTGATGA<br>CC   |
